# Supplementary material for: Enzymatic Transesterification of Kraft Lignin with Long Acyl Chains in Ionic Liquids
Source: PubMed Central journal article supplement (PMC6332217; doi:10.3390/molecules200916334), 2015-09-09
Supplement: molecules-20-16334-s001.pdf [file molecules-20-16334-s001.pdf]

## Supplementary Information

**Table S1.** FT-IR absorbance characteristics of original Kraft lignin between 4000 and 600  $\text{cm}^{-1}$  according to literature data [1–3].

| Bands Origin                                                         | Wavenumber ( $\text{cm}^{-1}$ ) |
|----------------------------------------------------------------------|---------------------------------|
| Phenolic and aliphatic hydroxyl groups                               | 3510                            |
| C-H stretching in aromatic methoxyl and methyl plus methylene groups | 2936                            |
|                                                                      | 2843                            |
| Aromatic rings vibrations                                            | 1593                            |
|                                                                      | 1510                            |
| C-H asymmetric deformation                                           | 1454                            |
| C-H deformation and aromatic ring vibration                          | 1425                            |
| O-H phenolic and aliphatic C-H in methyl groups                      | 1369                            |
| vibration of G units with C=O stretching                             | 1265                            |
| C-C, C-O and C=O stretching                                          | 1213                            |
| C-H in plane deformation of G units                                  | 1142                            |
| C-H in plane deformation plus C-O stretching                         | 1030                            |

### Reference

1. Schorr, D.; Diouf, P.N.; Stevanovic, T. Evaluation of industrial lignins for biocomposites production. *Ind. Crop. Prod.* **2014**, *52*, 65–73.
2. Chu, S.; Subrahmanyam, A.V.; Huber, G.W. The pyrolysis chemistry of a  $\beta$ -O-4 type oligomeric lignin model compound. *Green Chem.* **2013**, *15*, 125–136.
3. Guigo, N.; Mija, A.; Vincent, L.; Sbirrazzuoli, N. Molecular mobility and relaxation process of isolated lignin studied by multifrequency calorimetric experiments. *Phys. Chem. Chem. Phys.* **2009**, *11*, 1227–1236.
